# Supplementary material
Source: PubMed Central journal article supplement (PMC3089519)
Supplement: supp_M110.192799_jbc.M110.192799-2.pdf [file supp_M110.192799_jbc.M110.192799-2.pdf]

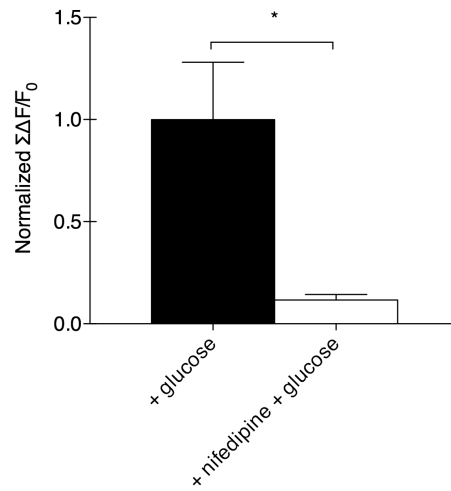

**Fig. S2** *Nifedipine blocks glucose-stimulated exocytosis as measured by TIRFM.*  $\beta$ TC3 cells were transfected with SEP-VAMP2, and secretory granule exocytosis was observed using TIRFM. Glucose-starved cells were stimulated with 8 mM glucose alone, or pretreated with 25  $\mu$ M nifedipine before glucose stimulation. Sum changes to baseline fluorescence were quantified for 30 frames following glucose treatment and normalized to the glucose-treated condition. The \* indicates statistical significance ( $P < 0.05$ , two-tailed t-test,  $N = 6$ ), and error bars indicate the SEM.
